# Supplementary material for: Einsatzmöglichkeiten digitaler Tools in der postoperativen Schmerztherapie
Source: Springer Nature journal article supplement (doi:10.1007/s00482-023-00732-7), 2023-07-10
Supplement: MOESM1 [file 25598632]

## Online-Zusatzmaterial

**Tab. 1** Übersicht der eingeschlossenen Studien

\* = im Text erwähnt

| Autor:innen                                | Jahr | Bevorzugte Anwendergruppe  | Digitales Tool                | Journal                                                   |
|--------------------------------------------|------|----------------------------|-------------------------------|-----------------------------------------------------------|
| <b>Dokumentation &amp; Erfassung</b>       |      |                            |                               |                                                           |
| Carlier et al.                             | 2021 | Erwachsene                 | App - Smartphone              | Anaesthesia, Critical Care & Pain Medicine                |
| Carrier et al.                             | 2016 | Erwachsene                 | Textnachrichten               | Journal of Visceral Surgery                               |
| Cheng et al.                               | 2021 | Erwachsene                 | Textnachrichten               | Journal of Thoracic Disease                               |
| Chiu et al. *                              | 2019 | Erwachsene                 | App - Smartphone              | Canadian Journal of Anaesthesia                           |
| Dahlberg et al.*                           | 2019 | Erwachsene                 | App - Smartphone              | International Journal of Surgery                          |
| Drake-Brockman et al.                      | 2022 | Kinder                     | Textnachrichten               | Paediatric Anaesthesia                                    |
| Highland et al.*                           | 2019 | Erwachsene                 | App - Smartphone              | Pain Medicine                                             |
| van Hout et al.                            | 2020 | Erwachsene                 | App – Tablet & Smartphone     | Hernia: The Journal of Hernias and Abdominal Wall Surgery |
| Jaensson et al.*                           | 2017 | Erwachsene                 | App - Smartphone              | British Journal of Anaesthesia                            |
| Kane et al.                                | 2020 | Erwachsene                 | Webbasierte Plattform         | Journal of Shoulder and Elbow Surger                      |
| Khanwalkar et al.                          | 2019 | Erwachsene                 | Webbasierte Plattform         | International Forum of Allergy & Rhinology                |
| Ooi et al.                                 | 2021 | Erwachsene                 | Textnachrichten               | Journal of Medical Systems                                |
| Schiavo et al.                             | 2022 | Erwachsene                 | App - Smartphone              | PloS One                                                  |
| Slepian et al.                             | 2020 | Erwachsene                 | Webbasierte Plattform         | Digital Health                                            |
| Sood et al.                                | 2020 | Erwachsene                 | App - Smartphone              | Plastic and Reconstructive Surgery Global Open            |
| Sun et al.                                 | 2015 | Kinder                     | App - Smartphone              | Paediatric Anaesthesia                                    |
| Thiel et al.                               | 2020 | Erwachsene & med. Personal | App - Smartphone              | PLOS ONE                                                  |
| Thiel et al.                               | 2022 | Medizinisches Personal     | App - Smartphone              | JMIR Human Factor                                         |
| Tiozzo et al.                              | 2021 | Kinder & Eltern            | App - Smartphone              | Journal of Child Health Care                              |
| Walrave et al.*                            | 2022 | Eltern & Kinder            | App - Smartphone              | PAIN                                                      |
| <b>Schmerzmanagement &amp; Information</b> |      |                            |                               |                                                           |
| Birnie et al.                              | 2018 | Kinder                     | App - Smartphone              | Canadian Journal of Pain                                  |
| Darnall et al.*                            | 2019 | Erwachsene                 | Webbasierte Plattform         | Pain Medicine                                             |
| Dotto et al.                               | 2020 | Erwachsene                 | App - Smartphone              | Canadian Journal of Anaesthesia                           |
| Glauser et al.*                            | 2019 | Erwachsene                 | App - Smartphone              | Mhealth                                                   |
| Newton et al.                              | 2017 | Kinder                     | App - Smartphone              | International Journal of Pediatric Otorhinolaryngology    |
| Pizzi et al.                               | 2020 | Erwachsene                 | Digitaler Medikamentenspender | Orthopedic Nursing                                        |
| Sun et al.*                                | 2018 | Eltern & Med. Personal     | App - Smartphone              | Paediatric Anaesthesia                                    |
| Timmers et al.                             | 2019 | Erwachsene                 | App - Smartphone              | JMIR MHealth and UHealth                                  |
| Weyns et al.                               | 2020 | Erwachsene                 | Digitale Schmerzpumpe         | Acta Anaesthesiologica Belgica                            |

| <b>Entscheidungsunterstützung</b> |      |                        |                                                   |                                                      |
|-----------------------------------|------|------------------------|---------------------------------------------------|------------------------------------------------------|
| Momtahan et al.                   | 2007 | Medizinisches Personal | Algorithmus-basierte Software                     | Studies in Health Technology and Informatics         |
| Pronk et al.*                     | 2020 | Erwachsene             | App - Smartphone                                  | JMIR MHealth and UHealth                             |
| Shah et al.*                      | 2019 | Medizinisches Personal | Anästhesie-<br>Informations-<br>Management-System | Anesthesia & Analgesia                               |
| <b>Supportive Schmerztherapie</b> |      |                        |                                                   |                                                      |
| Binay et al.                      | 2022 | Kinder                 | Virtuelle Realität                                | Journal of Perianesthesia Nursing                    |
| Cardenas et al.                   | 2021 | Kinder                 | Virtuelles<br>Rehabilitationsspiel                | Developmental<br>Neurorehabilitation                 |
| Cetinkaya et al.*                 | 2022 | Erwachsene             | Videos                                            | Scientific Reports                                   |
| Ding et al.*                      | 2019 | Erwachsene             | Virtuelle Realität                                | The Journal of International<br>Medical Research     |
| Dings et al.                      | 2021 | Erwachsene             | Virtuelle Realität                                | BJU International                                    |
| Gao et al.                        | 2021 | Kinder                 | Virtuelle Realität                                | National Journal of Andrology                        |
| Gray et al.                       | 2021 | Erwachsene             | Virtuelle Realität                                | Otolaryngology--Head and<br>Neck Surgery             |
| Hansen et al.                     | 2015 | Erwachsene             | App - Tablet                                      | BMC Complementary and<br>Alternative Medicine        |
| Hou et al.                        | 2019 | Erwachsene             | App - Smartphone                                  | JMIR MHealth and UHealth                             |
| House et al.                      | 2016 | Erwachsene             | Virtuelles<br>Rehabilitationsspiel                | British Journal of Pain                              |
| Mosso Vázquez et al.              | 2019 | Erwachsene             | Virtuelle Realität                                | Annual Review of<br>CyberTherapy and<br>Telemedicine |
| Olbrecht et al.*                  | 2021 | Kinder                 | Virtuelle Realität                                | Journal of Medical Internet<br>Research              |
| Olbrecht et al.                   | 2021 | Kinder                 | Virtuelle Realität                                | Pain Medicine                                        |
| Pandurangi et al.                 | 2022 | Erwachsene             | Virtuelle Realität                                | JAMA Otolaryngology--Head<br>& Neck Surgery          |
| Pandya et al.                     | 2017 | Erwachsene             | Virtuelle Realität                                | Korean Journal of<br>Anesthesiology                  |
| Rothgangel et al.                 | 2018 | Erwachsene             | Erweitere Realität                                | Clinical Rehabilitation                              |
| Rothgangel et al.                 | 2019 | Erwachsene             | Erweitere Realität                                | Clinical Rehabilitation                              |
| Specht et al.                     | 2021 | Kinder                 | Virtuelle Realität                                | The American Surgeon                                 |
| <b>Schmerzprädiktion</b>          |      |                        |                                                   |                                                      |
| Boselli et al.*                   | 2014 | Medizinisches Personal | Berechneter Index                                 | British Journal of<br>Anaesthesia                    |
| van Driel et al.*                 | 2022 | Medizinisches Personal | Künstliche Intelligenz                            | British Journal of<br>Anaesthesia                    |
| Fontaine et al.*                  | 2022 | Medizinisches Personal | Künstliche Intelligenz                            | European Journal of Pain                             |
| Low et al.*                       | 2021 | Medizinisches Personal | Künstliche Intelligenz                            | JMIR Cancer                                          |
| Tighe et al.*                     | 2015 | Medizinisches Personal | Künstliche Intelligenz                            | Pain Medicine                                        |
